# Supplementary material
Source: HighWire-hosted journal article supplement (http://dmd.aspetjournals.org/highwire/filestream/66493/field_highwire_adjunct_files/0/Supplement_64527.pdf)
Supplement: Supplement_64527.pdf [file Supplement_64527.pdf]

DMD#064527

Supplemental Data for Drug Metabolism and Disposition

**Pharmacokinetics and Metabolism of Delamanid, a Novel Anti-Tuberculosis Drug, in**

**Animals and Humans: Importance of Albumin Metabolism *In Vivo***

Katsunori Sasahara, Yoshihiko Shimokawa, Yukihiro Hirao, Noriyuki Koyama, Kazuyoshi

Kitano, Masakazu Shibata, and Ken Umehara

## Supplemental Methods

### Synthesis of M1 from delamanid with a single step reaction.

*Method A.* To a solution of **delamanid** (4.0 g, 7.5 mmol) in THF (40 mL) was added 25% *aq.* NH<sub>3</sub> solution (20 mL) at room temperature. The reaction mixture was refluxed for 20 min at 100 °C in sealed tube apparatus (ca. 0.8 MPa). The mixture was concentrated *in vacuo*. Purification of the residue by column chromatography (surface-modified silica gel with aminopropyl group; eluent, CH<sub>2</sub>Cl<sub>2</sub>/ MeOH=100/1) provided **M1** (1.6 g, 47%) as an amorphous solid. <sup>1</sup>H NMR (500 MHz, DMSO-*d*<sub>6</sub>)  $\delta$ : 1.38 (3H, s), 1.74 (2H, dddd, *J* = 12.2, 9.2, 8.2, 3.7 Hz), 2.00–2.07 (2H, m), 2.93 (2H, ddd, *J* = 12.2, 9.2, 3.1 Hz), 3.30 (1H, d, *J* = 12.2 Hz), 3.36 (2H, ddd, *J* = 12.2, 5.8, 3.7 Hz), 3.53 (1H, d, *J* = 12.2 Hz), 3.85 (1H, d, *J* = 10.4 Hz), 3.88 (1H, d, *J* = 10.4 Hz), 4.54 (1H, tt, *J* = 8.2, 3.7 Hz), 5.80 (2H, brs), 6.84 (2H, d, *J* = 9.2 Hz), 6.91 (2H, d, *J* = 9.2 Hz), 7.08 (2H, d, *J* = 9.2 Hz), 7.28 (2H, dq, *J* = 9.2, 0.6 Hz).

*Method B.* To a solution of **delamanid** (1.0 g, 1.9 mmol) in THF (20 mL) was added 1,3-diaminopropane (1.6 mL, 19 mmol) at room temperature. The reaction mixture was stirred for 16 h. The solvent was removed *in vacuo*. After addition of water, the mixture was extracted with CH<sub>2</sub>Cl<sub>2</sub>. The combined organic layers were dried over sodium sulfate. Removal of the solvent and purification of the crude product by column chromatography (surface-modified silica gel with aminopropyl group; eluent, CH<sub>2</sub>Cl<sub>2</sub>/MeOH=100/1) provided

DMD#064527

**M1** (0.67 g, 74%).

**Synthesis of M1 with a stepwise procedure.** (Kitano et al., 2009)

**(*R*)-1-Azido-2-methyl-3-(4-(4-(4-trifluoromethoxy-phenoxy)-piperidin-1-yl)-phenoxy)-propan-2-ol (2).** To a suspension of (*R*)-1-(4-((2-methyloxiran-2-yl)-methoxy)phenyl)-4-(4-(trifluoro-methoxy)phenoxy)piperidine (**1**, Tsubouchi et al., 2008) (1.7 g, 4.0 mmol) in MeOH (40 mL) and water (5 mL) were added NH<sub>4</sub>Cl (0.48 g, 8.9 mmol) and sodium azide (1.5 g, 20 mmol) and the mixture was refluxed for 16 h. The reaction mixture was allowed to cool to room temperature and the solvent was removed *in vacuo*. After addition of water, the mixture was extracted with AcOEt. The extract was washed with water, and then with a saturated aqueous solution of NaCl. The combined organic layers were dried over sodium sulfate. Removal of the solvent and purification of the crude product by column chromatography (silica gel; eluent, hexane/ AcOEt =65/35) provided **2** (1.8 g, 98%) as a colorless oil. <sup>1</sup>H NMR (250 MHz, CDCl<sub>3</sub>) δ: 1.33 (3H, s), 1.80–2.25 (4H, m), 2.85–3.10 (2H, m), 3.25–3.50 (4H, m), 3.80 (1H, d, *J* = 9.1 Hz), 3.86 (1H, d, *J* = 9.1 Hz), 4.25–4.50 (1H, m), 6.50–7.00 (6H, m), 7.14 (2H, d, *J* = 9.6 Hz).

**(*R*)-1-Amino-2-methyl-3-(4-(4-(4-trifluoromethoxy-phenoxy)-piperidin-1-yl)-phenoxy)-propan-2-ol (3).** A mixture of azide **2** (2.7 g, 5.7 mmol) and palladium on activated carbon

DMD#064527

(10 wt % Pd, 0.27 g) in EtOH (50 mL) was stirred at room temperature under a hydrogen atmosphere at normal pressure. The reaction mixture was filtered over Celite. Removal of the solvent from the combined filtrates afforded **3** (2.1 g, 83%) as a gray amorphous solid.  $^1\text{H}$  NMR (250 MHz,  $\text{CDCl}_3$ )  $\delta$ : 1.26 (3H, s), 1.80–2.25 (4H, m), 2.64 (1H, d,  $J = 12.9$  Hz), 2.80–3.15 (2H, m), 2.98 (1H, d,  $J = 12.9$  Hz), 3.25–3.40 (2H, m), 3.79 (2H, s), 4.30–4.50 (1H, m), 6.75–7.00 (6H, m), 7.13 (2H, d,  $J = 9.1$  Hz).

**(R)-5-Methyl-5-(4-(4-(4-trifluoromethoxy-phenoxy)-piperidin-1-yl)-phoxymethyl)-**

**4,5-di-hydro-oxazol-2-ylamine (M1).** To a solution of 2-aminoalcohol (**3**) (4.9 g, 11 mmol) in anhydrous MeOH (50 mL) were added sodium acetate (2.0 g, 24 mmol) and cyanogen bromide (1.5 g, 13 mmol) at room temperature. The reaction mixture was stirred for 2.5 h at room temperature and then refluxed for 3.5 h. The reaction mixture was allowed to cool to room temperature and the solvent was removed *in vacuo*. After addition of a saturated aqueous solution of  $\text{NaHCO}_3$ , the mixture was extracted with AcOEt. The combined organic layers were dried over sodium sulfate. Removal of the solvent and purification of the crude product by column chromatography (surface-modified silica gel with aminopropyl group; eluent,  $\text{CH}_2\text{Cl}_2/\text{MeOH} = 100/1$ ) and recrystallization from hexane–AcOEt provided **M1** (3.5 g, 67%) as a white powder, mp 109–111 °C.  $^1\text{H}$  NMR (500 MHz,  $\text{DMSO}-d_6$ )  $\delta$ : 1.38 (3H, s), 1.74 (2H, dddd,  $J = 12.2, 9.2, 8.2, 3.7$  Hz), 2.00–2.07 (2H,

DMD#064527

m), 2.93 (2H, ddd,  $J = 12.2, 9.2, 3.1$  Hz), 3.30 (1H, d,  $J = 12.2$  Hz), 3.36 (2H, ddd,  $J = 12.2, 5.8, 3.7$  Hz), 3.53 (1H, d,  $J = 12.2$  Hz), 3.85 (1H, d,  $J = 10.4$  Hz), 3.88 (1H, d,  $J = 10.4$  Hz), 4.54 (1H, tt,  $J = 8.2, 3.7$  Hz), 5.80 (2H, brs), 6.84 (2H, d,  $J = 9.2$  Hz), 6.91 (2H, d,  $J = 9.2$  Hz), 7.08 (2H, d,  $J = 9.2$  Hz), 7.28 (2H, dq,  $J = 9.2, 0.6$  Hz).

**Synthesis of M3 and M2.** (Kitano et al., 2009)

**(*R*)-3-Bromo-2-hydroxy-2-methyl-propionic acid ethyl ester (5).** To a solution of (*R*)-3-bromo-2-hydroxy-2-methyl-propionic acid (**4** is commercially available) (0.50 g, 2.8 mmol) in anhydrous EtOH (10 mL) was added TsOH·H<sub>2</sub>O (52 mg, 0.28 mmol) and the mixture was refluxed for 7 h. The reaction mixture was allowed to cool to room temperature and the solvent was removed *in vacuo*. After addition of a saturated aqueous solution of NaHCO<sub>3</sub>, the mixture was extracted with AcOEt. The extract was washed with an aqueous solution of NaHCO<sub>3</sub>, and then with a saturated aqueous solution of NaCl. The combined organic layers were dried over sodium sulfate. Removal of the solvent provided ethyl ester **5** (0.48 g, 83%) as a light yellow oil. <sup>1</sup>H NMR (250 MHz, CDCl<sub>3</sub>)  $\delta$ : 1.33 (3H, t,  $J = 7.1$  Hz), 1.54 (3H, s), 3.48 (1H, d,  $J = 10.3$  Hz), 3.49 (1H, s), 3.70 (1H, d,  $J = 10.3$  Hz), 4.22–4.37 (2H, m).

**(*S*)-2-Hydroxy-2-methyl-3-(4-(4-(4-trifluoromethoxyphenoxy)piperidin-1-yl)phenoxy)-**

**propionic acid ethyl ester (7).** To a solution of (*R*)-bromoester (**5**) (17 g, 80 mmol) in anhydrous EtOH (250 mL) were added 4-(4-(4-(trifluoromethoxy)phenoxy)piperidin-1-yl)-phenol (**6**, Tsubouchi et al., 2008) (26 g, 73 mmol) and 20% NaOEt–EtOH solution (33 mL). The mixture was stirred for 16 h at 90 °C under an argon atmosphere. After the reaction mixture was allowed to cool to room temperature, it was poured into an aqueous solution of ice–NH<sub>4</sub>Cl and extracted with CH<sub>2</sub>Cl<sub>2</sub>. The combined organic layers were dried over sodium sulfate. Removal of the solvent and purification of the crude product by column chromatography (surface-modified silica gel with aminopropyl group; eluent, hexane/ AcOEt =65/35) provided **7** (33 g, 94%) as a light brown oil. <sup>1</sup>H NMR (250 MHz, CDCl<sub>3</sub>) δ: 1.26 (3H, t, *J* = 7.1 Hz), 1.47 (3H, s), 1.80–2.20 (4H, m), 2.85–3.15 (2H, m), 3.25–3.45 (2H, m), 3.53 (1H, s), 3.93 (1H, d, *J* = 9.0 Hz), 4.15 (1H, d, *J* = 9.0 Hz), 4.25 (2H, q, *J* = 7.1 Hz), 4.30–4.50 (1H, m), 6.70–7.00 (6H, m), 7.14 (2H, d, *J* = 9.9 Hz).

**(*S*)-2-Imino-5-methyl-5-((4-(4-(4-(trifluoromethoxy)phenoxy)piperidin-1-yl)phenoxy)-methyl)oxazolidin-4-one (M3).** To a suspension of guanidine hydrochloride (7.4 g, 78 mmol) in anhydrous EtOH (50 mL) was added 20% NaOEt–EtOH solution (27 mL) at 0 °C under an argon atmosphere. Subsequently, hydroxyester (**7**) (15 g, 31 mmol) in anhydrous EtOH (100 mL) was added dropwise at 0 °C. After 48 h of stirring at room temperature under an argon atmosphere, ice was added and the mixture was adjusted to pH 5–6 with 6*N*

DMD#064527

HCl (11 mL). After addition of an aqueous solution of  $\text{NH}_4\text{Cl}$ , the mixture was extracted with  $\text{CH}_2\text{Cl}_2$ . The combined organic layers were dried over sodium sulfate. Removal of the solvent and purification of the crude product by column chromatography (surface-modified silica gel with aminopropyl group; eluent,  $\text{CH}_2\text{Cl}_2/\text{MeOH}=20/1$ ) and recrystallization from 2-propanol provided imino-ketone **M3** (8.4 g, 57%) as a white powder, mp 178–180 °C.  $^1\text{H}$  NMR (500 MHz,  $\text{DMSO}-d_6$ )  $\delta$ : 1.39 (3H, s), 1.73 (2H, dddd,  $J = 12.5, 9.2, 8.2, 3.7$  Hz), 2.00–2.07 (2H, m), 2.93 (2H, ddd,  $J = 12.2, 9.2, 3.6$  Hz), 3.36 (2H, ddd,  $J = 12.2, 5.8, 3.7$  Hz), 4.07 (2H, s), 4.54 (1H, tt,  $J = 8.2, 3.7$  Hz), 6.78 (2H, d,  $J = 9.2$  Hz), 6.89 (2H, d,  $J = 9.2$  Hz), 7.08 (2H, d,  $J = 9.2$  Hz), 7.28 (2H, dq,  $J = 9.2, 0.9$  Hz), 8.33 (1H, brs), 8.57 (1H, brs).

**(4*RS*,5*S*)-2-amino-5-methyl-5-((4-(4-(4-(trifluoromethoxy)phenoxy)piperidin-1-yl)-**

**phenoxy)methyl)-4,5-dihydrooxazol-4-ol (M2).** To a solution of imino-ketone **M3** (4.2 g, 88 mmol) in  $\text{CH}_2\text{Cl}_2$  (200 mL) was added dropwise diisobutylaluminium hydride (33 mL, 31 mmol; 0.93 M in hexane) at -40 °C under an argon atmosphere. After 4.5 h of stirring at -40 °C, MeOH (10 mL) was added and the mixture was stirred under warming to room temperature. After addition of  $\text{CH}_2\text{Cl}_2$  and an aqueous solution of  $\text{NH}_4\text{Cl}$ , the precipitate was separated from the filtrate. After the precipitated material was dissolved with aqueous acetic acid, the mixture was extracted with  $\text{CH}_2\text{Cl}_2$ . The combined organic layers were dried over sodium sulfate. Removal of the solvent and purification of the crude product by

DMD#064527

column chromatography (silica gel; eluent, CH<sub>2</sub>Cl<sub>2</sub>/MeOH/25% *aq.* NH<sub>3</sub> soln.=50/10/1)

provided amino-alcohol **M2** (3.5 g, 83%) as a white amorphous solid (a mixture of two

diastereomers = *ca.* 60:40). <sup>1</sup>H NMR (500 MHz, DMSO-*d*<sub>6</sub>) δ: 1.31 (3H, s), 1.69–1.78 (2H,

m), 2.00–2.08 (2H, m), 2.92 (2H, ddd, *J* = 12.5, 8.9, 3.1 Hz), 3.35 (2H, ddd, *J* = 12.5, 5.8, 3.1

Hz), 3.80 (1.2H, s), 3.97 (0.4H, d, *J* = 10.7 Hz), 4.01 (0.4H, d, *J* = 10.7 Hz), 4.54 (1H, tt, *J* =

8.2, 3.7 Hz), 4.94 (0.4H, d, *J* = 3.1 Hz), 5.01 (0.6H, d, *J* = 3.1 Hz), 5.31 (1H, brs), 6.07 (2H,

brs), 6.81 (0.8H, d, *J* = 9.2 Hz), 6.83 (1.2H, d, *J* = 9.2 Hz), 6.90 (1.2H, d, *J* = 9.2 Hz), 6.92

(0.8H, d, *J* = 9.2 Hz), 7.08 (2H, d, *J* = 9.2 Hz), 7.28 (2H, d, *J* = 9.2 Hz).



## Supplemental Figures

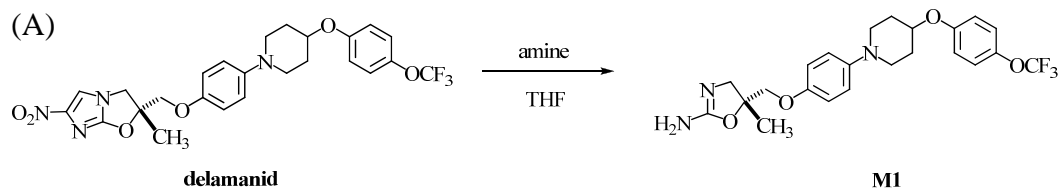

| method | amine                                                                           | apparatus   | temp. (°C) | time (hr) | press. (MPa) | M1 (% yield) |
|--------|---------------------------------------------------------------------------------|-------------|------------|-----------|--------------|--------------|
| A      | 25% aq. NH <sub>3</sub>                                                         | sealed tube | 100        | 0.33      | 0.8          | 47           |
| B      | H <sub>2</sub> NCH <sub>2</sub> CH <sub>2</sub> CH <sub>2</sub> NH <sub>2</sub> | open system | 25         | 16        | 0.1          | 74           |

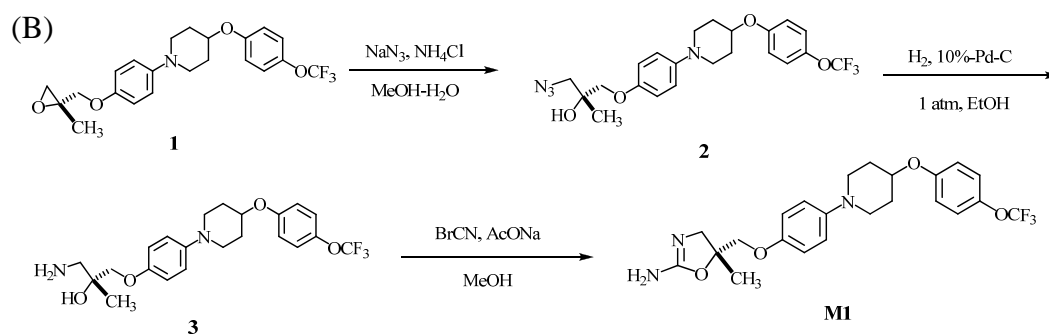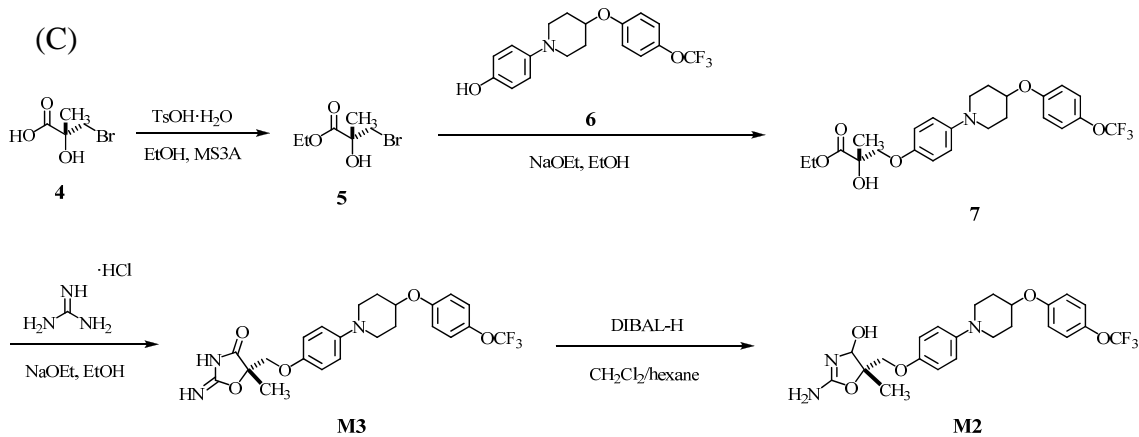

Supplemental Fig. 1. Synthesis scheme of standard M1 (A and B), M2 (C), and M3(C)

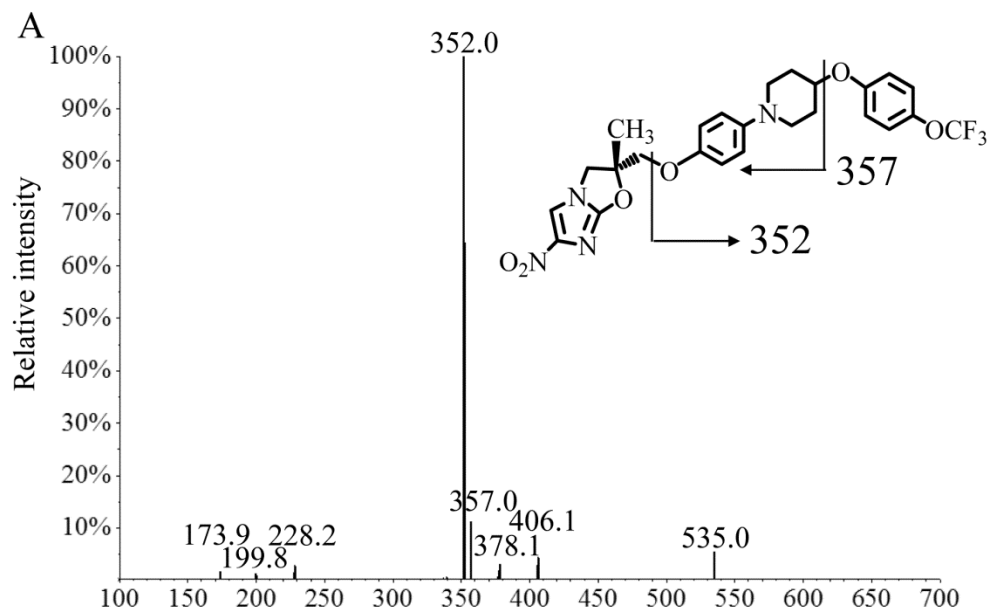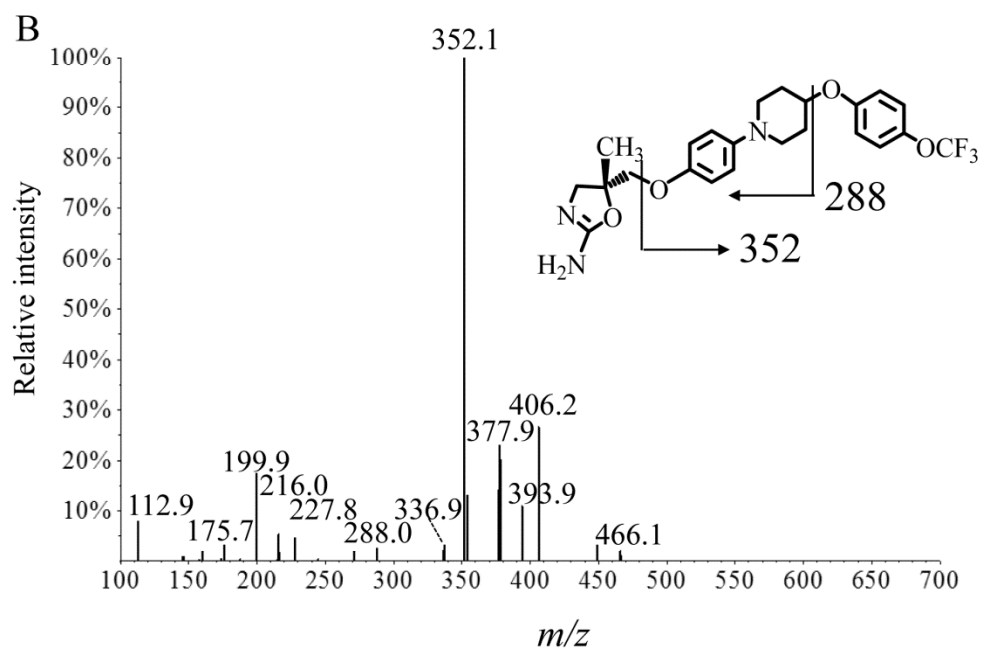

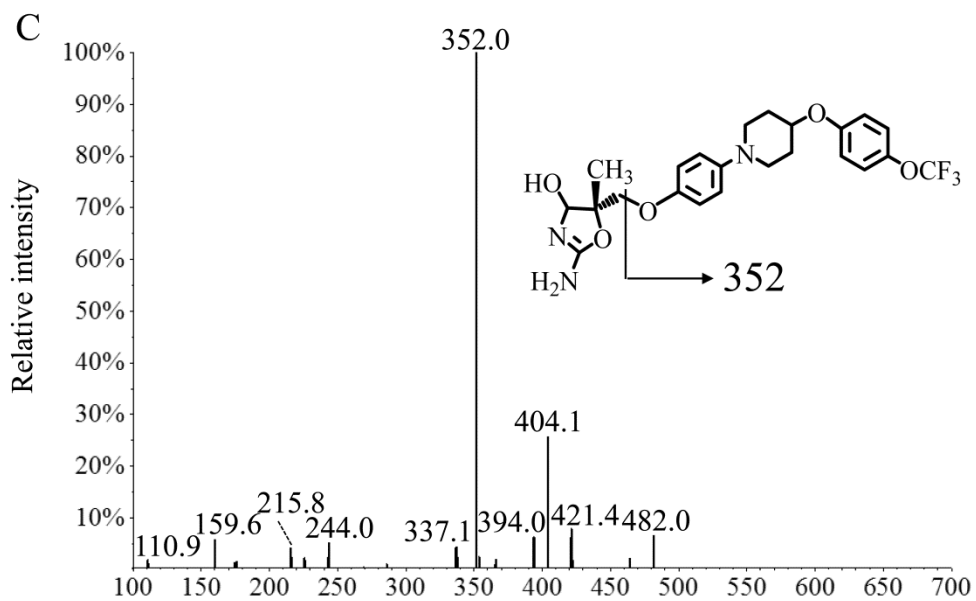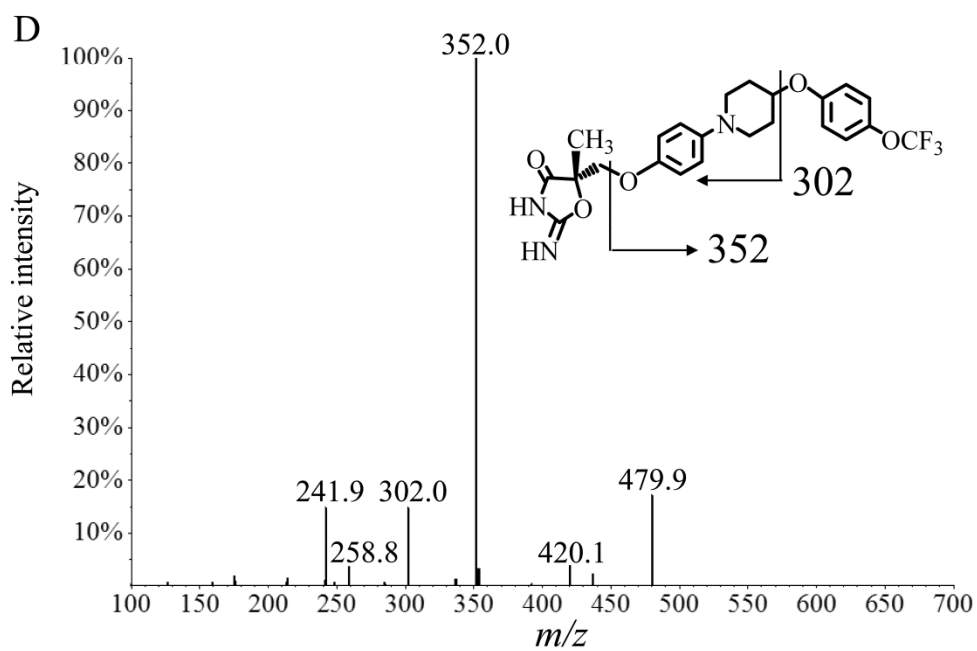

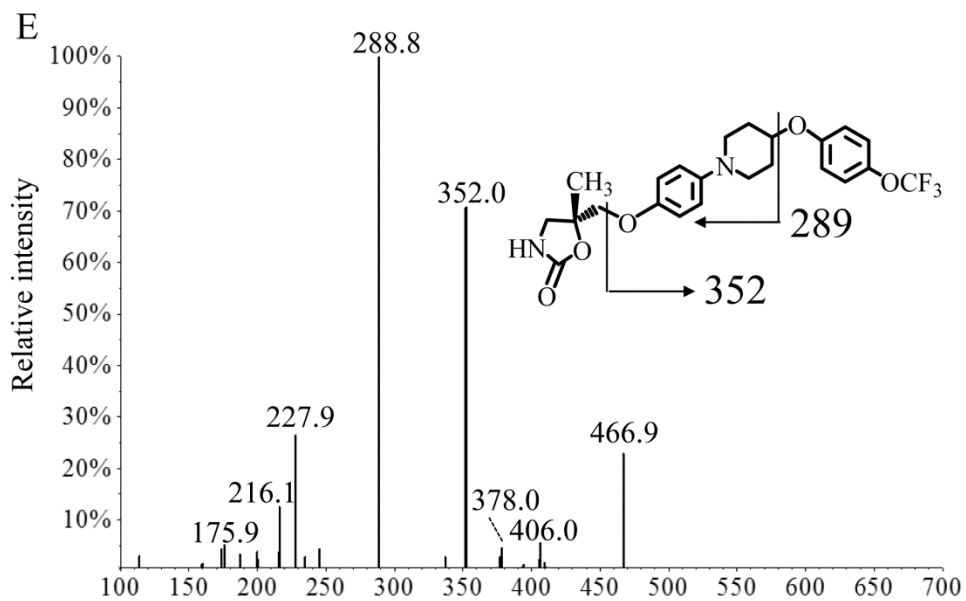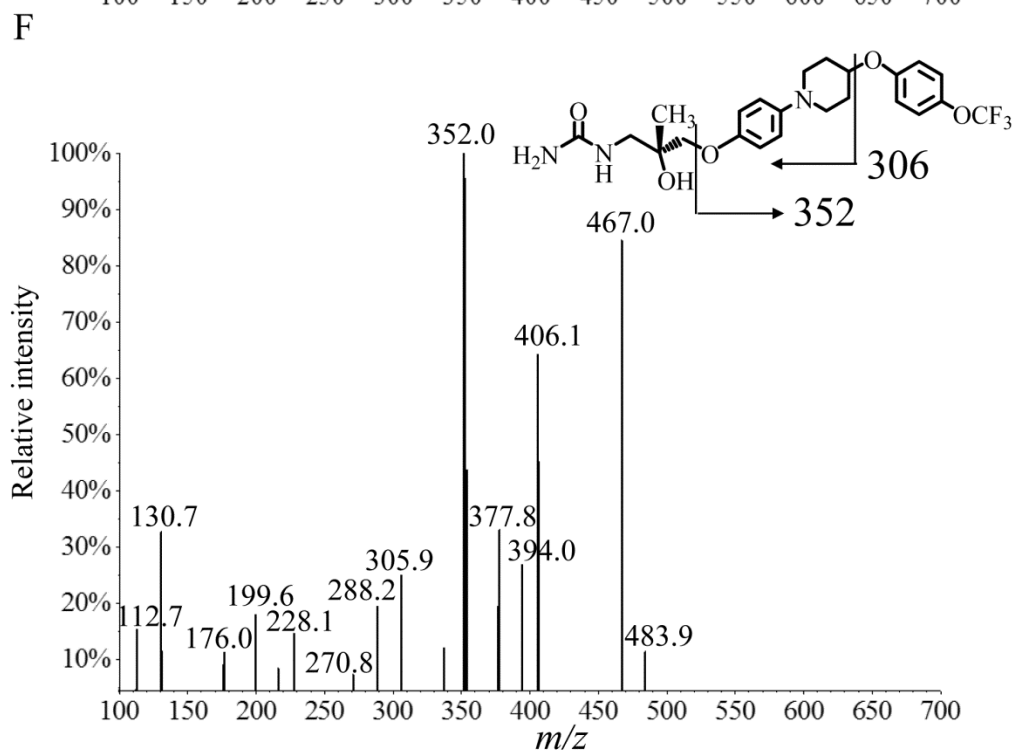

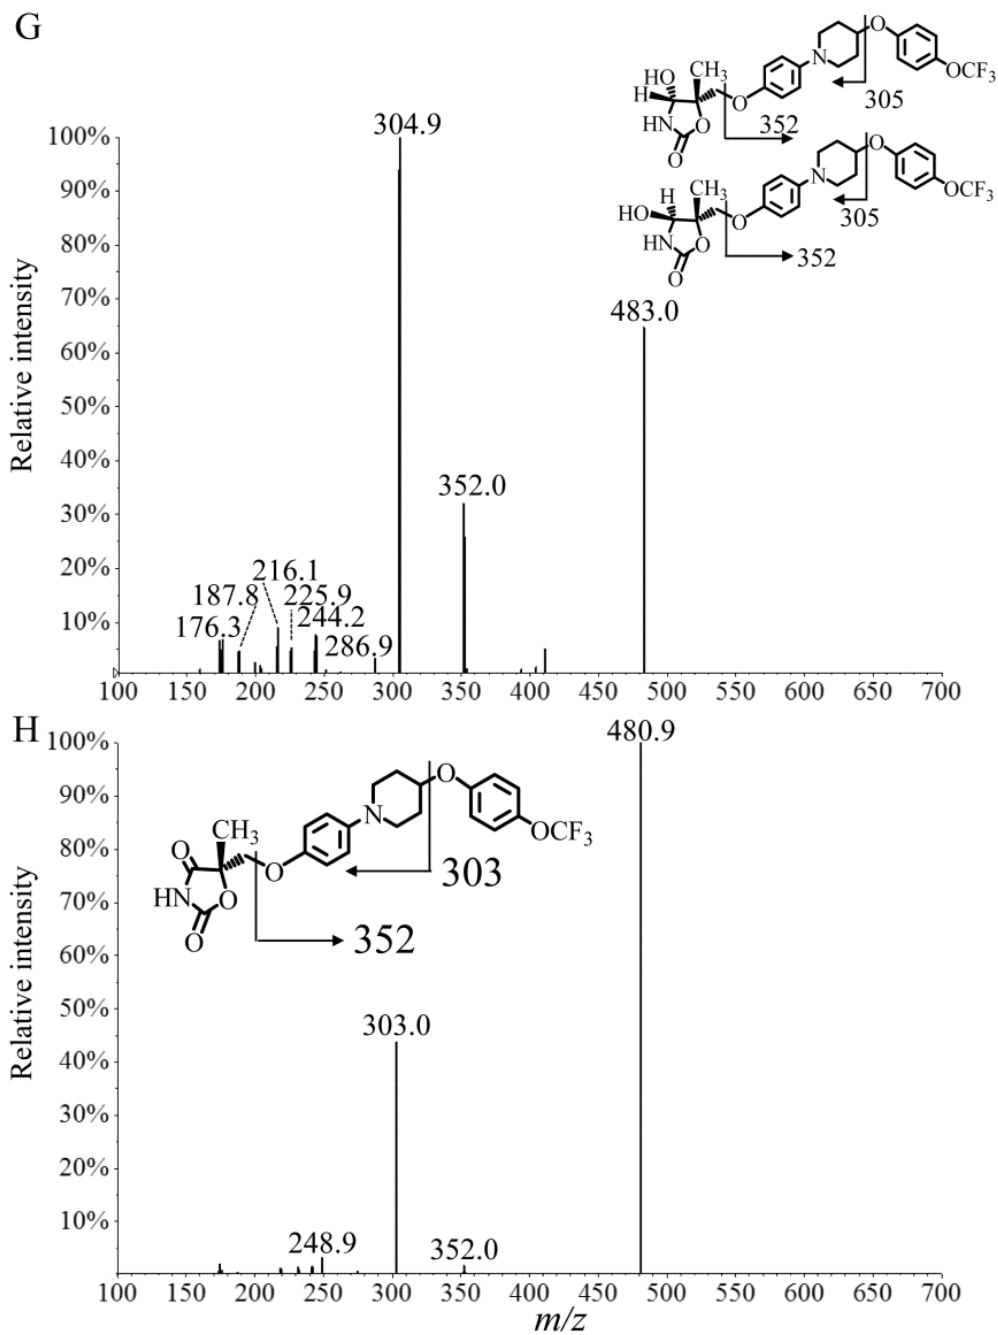

Supplemental Fig. 2. MS/MS spectra of delamanid (A,  $m/z$  535), M1 (B,  $m/z$  466), M2 (C,  $m/z$  482), M3 (D,  $m/z$  480), M4 (E,  $m/z$  467), M5 (F,  $m/z$  484), M6 and M7 (G,  $m/z$  483), and M8 (H,  $m/z$  481).

### Supplemental References

- Kitano K, Matsubara J, and Kato K (2009) Nitrogen-containing heterocyclic compounds as bactericides for multidrug-resistant Mycobacterium tuberculosis, atypical Mycobacterium Jpn. Kokai Tokkyo Koho JP2009269859, 2009. *Chem Abstr* **151**:521155.
- Tsubouchi H, Haraguchi Y, Hayakawa S, Utsumi N, Taira S, Tanada Y, Fujita N, Shinhamma K, Annaka K, and Furuta T (2008) A process for preparing epoxy compounds PCT Int. Appl. WO2008140090, 2008. *Chem Abstr* **149**:576384.
